# Supplementary material
Source: MDPI journal article supplement (https://www.mdpi.com/2073-4433/13/6/889)
Supplement: s1 [file s1]

# High level of Ammonium Nitrogen Increases Net Ecosystem Productivity in a *Quercus Liaotungensis* Forest in Northern China

Suppl. Materials

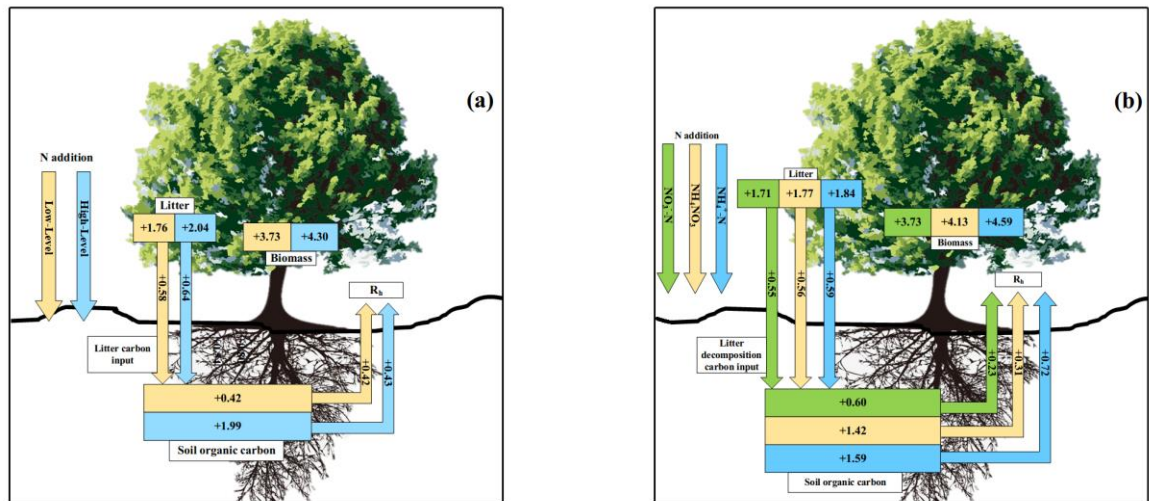

Figure S1. the parameters of different parts of the tree.
